# Supplementary material for: Characterizations of Nb-doped WO3nanomaterials and their enhanced photocatalytic performance
Source: Royal Society of Chemistry journal article supplement (doi:10.1039/c4ra04080e), 2014-07-30
Supplement: c4ra04080e1.pdf [file c4ra04080e1.pdf]

## Supporting information

### **Characterizations of Nb-doped WO<sub>3</sub> nanomaterials and their enhanced photocatalytic performance**

Wanjun Mu, Xiang Xie, Xingliang Li, Rui Zhang, Qianhong Yu, Kai Lv, Hongyuan Wei, Yuan

Jian\*

*Institute of Nuclear Chemistry and Physics, China Academy of Engineering Physics, 64#*

*Mianshan Road, Mianyang, 621900, Sichuan Province, P. R. China*

---

\* Corresponding author: Tel: +86 816 2494854.

E-mail address: [muwj1012@163.com](mailto:muwj1012@163.com)

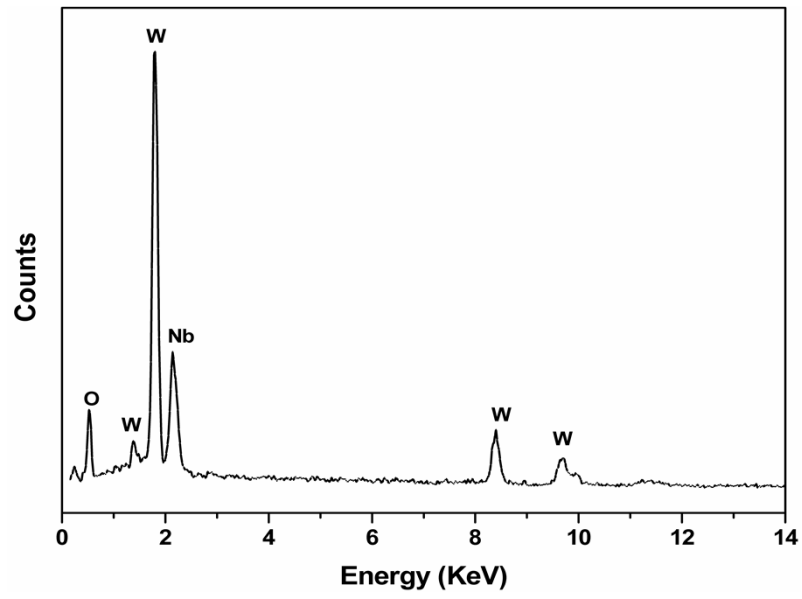

**Fig.1. EDX spectra of Nb-doped  $\text{WO}_3$  (the atomic ratio of Nb/W is 0.03)**
